# Supplementary material
Source: PubMed Central journal article supplement (PMC3122744)
Supplement: supp_49_6_2109__1.pdf [file supp_49_6_2109__1.pdf]

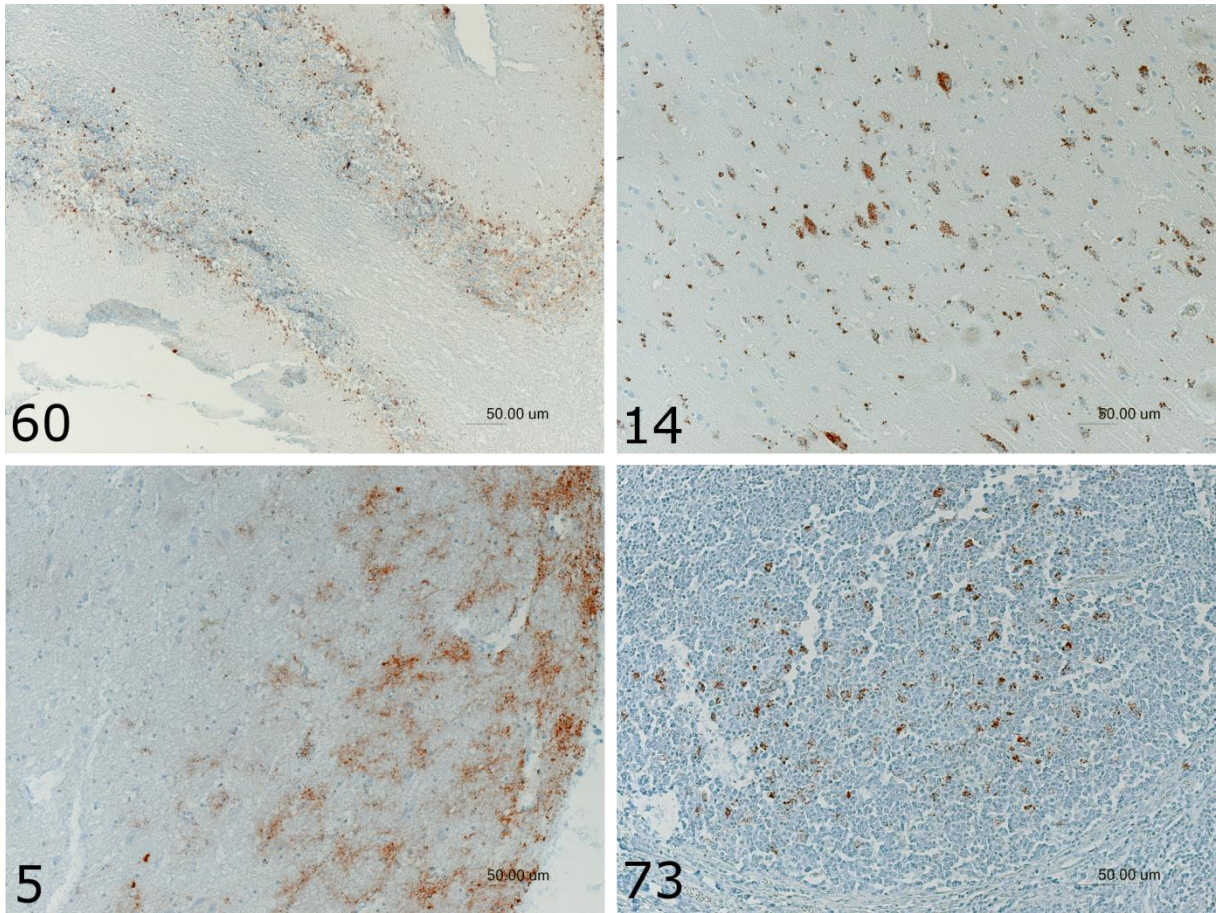

**Supplemental Figure S1:** Immunohistochemistry of exemplary classical scrapie affected goats. ID numbers of individual animals are indicated. G60: granular and punctate PrP<sup>d</sup> deposition in the molecular layer of the cerebellar cortex, G14: intraneuronal and glial PrP<sup>d</sup> deposition in the occipital cortex, G5: granular and particulate PrP<sup>d</sup> deposition in the cranial medulla oblongata and G73: PrP<sup>d</sup> deposition in a lymph-follicle in the tonsils.
