# Supplementary material
Source: PubMed Central journal article supplement (PMC3122744)
Supplement: supp_49_6_2109__2.pdf [file supp_49_6_2109__2.pdf]

**Supplemental Table S1:** Autolysis scores and intensity of PrP<sup>d</sup> deposition in different neuroanatomical structures and tonsils in immunohistochemistry in classical scrapie affected goats and those goats with the aberrant ~12 kDa PrP<sup>res</sup>. \*

| Animal ID             | Neuroanatomical structure |      |                   |          |          |              |              |                 |                  |                 |                | Tonsils | Autolysis Score |  |
|-----------------------|---------------------------|------|-------------------|----------|----------|--------------|--------------|-----------------|------------------|-----------------|----------------|---------|-----------------|--|
|                       | Medulla. oblongata        | Pons | Cerebellar Cortex | Midbrain | Thalamus | Hippo-campus | Basal nuclei | Occipial cortex | Lobus piriformis | Parietal cortex | Frontal cortex |         |                 |  |
| Classical scrapie     |                           |      |                   |          |          |              |              |                 |                  |                 |                |         |                 |  |
| G14                   |                           |      |                   | 1.5      | 2.5      | 2            |              | 3               |                  | 2.5             | 2              |         | 3               |  |
| G20                   | 0                         | 0    | 0                 | 0        | 0        | 0            |              | 0               | 0                | 0               | 0              |         | 2               |  |
| G21                   |                           | 1.5  | 0.5               | 0        | 0        | 0.5          | 0.5          | 0               | 0                | 0               | 0              |         | 3               |  |
| G32                   | 2                         | 2    | 1                 | 1.5      | 2        | 0.5          | 0            | 0.5             | 1                | 0.5             | 0              |         | 3               |  |
| G39                   |                           | 2.5  | 1                 |          | 1.5      | 0            |              | 0.5             |                  | 0               | 2              | 3       | 3               |  |
| G45                   | 3                         |      | 1                 | 2        | 2        | 0.5          | 0            | 0               | 0                | 0               | 0              | 3       | 3               |  |
| G5                    | 2                         |      | 0.5               | 1        | 2        | 0            | 0            | 0               | 0                | 0               | 0              |         | 3.5             |  |
| G61                   |                           |      | 2                 | 3        | 3        | 2            | 2            | 0.5             | 3                | 1.5             | 2.5            |         | 3               |  |
| G69                   |                           |      | 2                 |          | 2        | 0.5          |              | 0.5             | 2                | 0.5             | 0              |         | 3               |  |
| G82                   | 1                         |      | 0                 |          | 0        | 0            |              | 0               | 0                | 0               | 0              | 3       |                 |  |
| G83                   |                           |      |                   |          | 0        | 0            |              | 0               | 0                | 0               | 0              |         | 3               |  |
| Aberrant ~12 kDa band |                           |      |                   |          |          |              |              |                 |                  |                 |                |         |                 |  |
| G17                   |                           |      | 0                 | 0        | 0        | 0            | 0            | 0               | 0                | 0               | 0              |         | 3               |  |
| G18                   |                           |      | 0                 | 0        | 0        | 0            | 0            | 0               | 0                | 0               | 0              |         | 3               |  |
| G22                   |                           |      | 0                 |          | 0        | 0            | 0            | 0               | 0                | 0               | 0              |         | 3.5             |  |
| G34                   | 0                         |      | 0                 | 0        | 0        | 0            | 0            | 0               | 0                | 0               | 0              |         | 3.5             |  |
| G50                   | 0                         |      | 0                 | 0        | 0        | 0            | 0            | 0               | 0                | 0               | 0              | 0       | 3               |  |
| G53                   | 0                         |      | 0                 | 0        | 0        | 0            | 0            | 0               | 0                | 0               | 0              | 0       | 3               |  |
| G57                   |                           |      | 0                 | 0        | 0        | 0            | 0            | 0               | 0                | 0               | 0              |         | 3.5             |  |
| G62                   |                           |      | 0                 | 0        | 0        | 0            | 0            | 0               | 0                | 0               | 0              |         | 3.5             |  |
| G72                   |                           |      | 0                 |          | 0        | 0            | 0            | 0               | 0                | 0               | 0              |         | 3               |  |
| G78                   | 0                         |      | 0                 | 0        | 0        | 0            | 0            | 0               | 0                | 0               | 0              |         | 3.5             |  |
| G84                   | 0                         |      | 0                 | 0        | 0        | 0            | 0            | 0               | 0                | 0               | 0              | 0       | 3.5             |  |

\*PrP<sup>d</sup> deposition score: 0, absent to 3, severe. Autolysis score: 0, absent to 4, severe.
